# Supplementary material for: Metatranscriptomic Insights into Microbial Network Modulation and Pathogen Dynamics Underlying Healing Outcomes in Non-Surgical Periodontal Treatment
Source: Research Square preprint supplement (doi:10.21203/rs.3.rs-5764431/v1), 2025-01-09
Supplement: Supplementary file 2 [file 1edb3bae96a6e48dec671028.pdf]

**Fig. S6****a**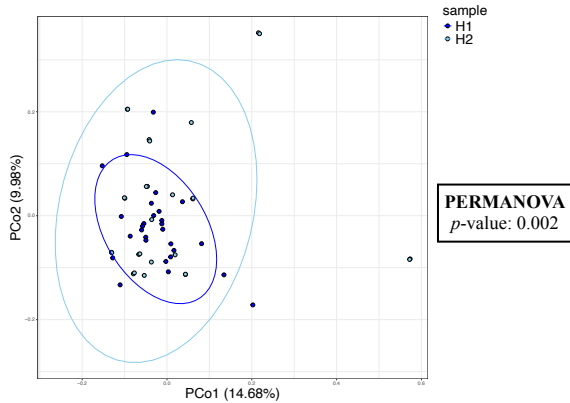**b**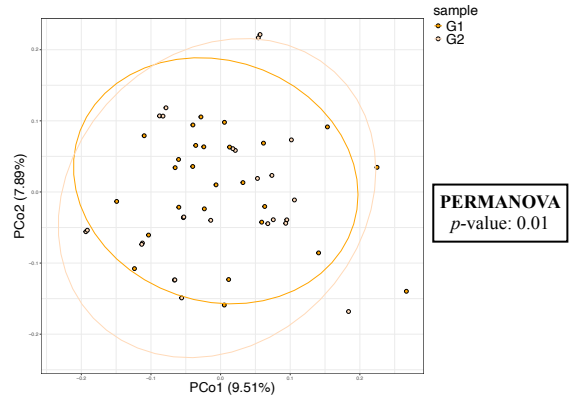**c**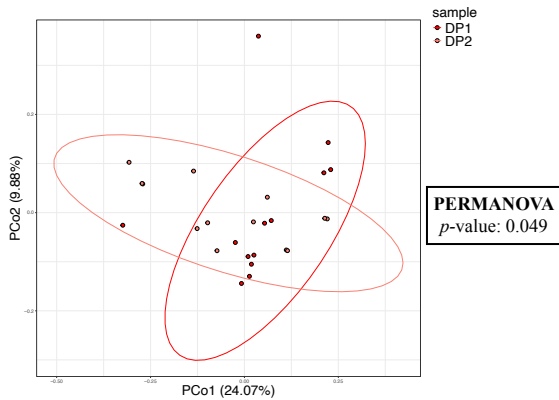**d**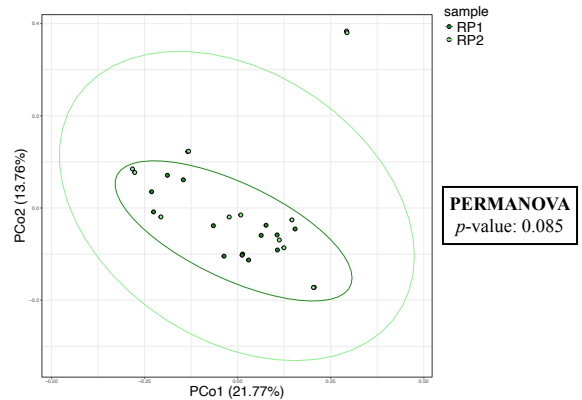**e**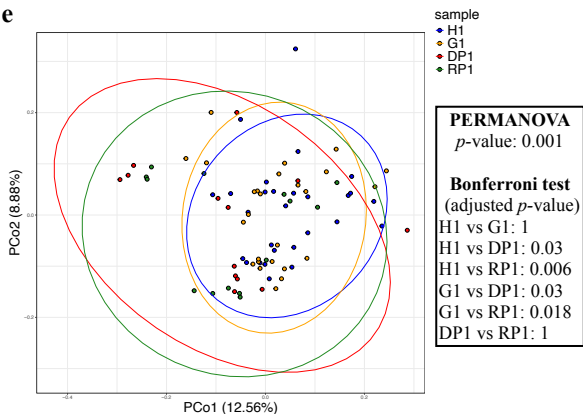**f**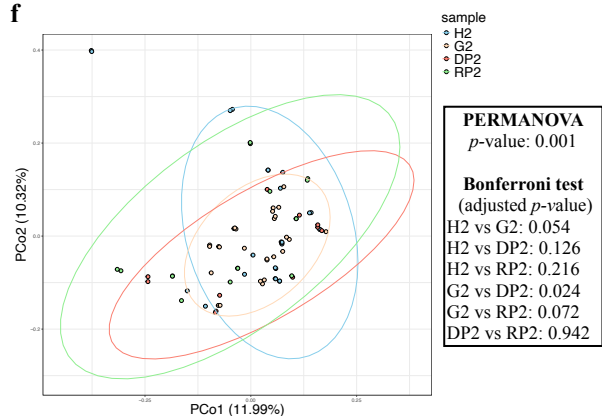

**Supplementary Fig. S6 PCoA and PERMANOVA using Bray-Curtis distance based on the functional gene abundance from VFDB.** Light colors indicate post-treatment samples for each group, contrasting with the darker colors for pre-treatment samples. The plots show each sample, and the ellipses indicate 95% confidence intervals. Group names are as indicated in Fig 1. (a-d) PCoA and PERMANOVA show longitudinal functional changes pre- and post-treatment using Bray-Curtis distance for the H, G, DP, and RP groups, respectively. (e, f) Multi-group comparisons between groups pre- and post-treatment using PCoA and PERMANOVA based on functional gene abundance.
