# Supplementary material for: Metatranscriptomic Insights into Microbial Network Modulation and Pathogen Dynamics Underlying Healing Outcomes in Non-Surgical Periodontal Treatment
Source: Research Square preprint supplement (doi:10.21203/rs.3.rs-5764431/v1), 2025-01-09
Supplement: Supplementary file 3 [file d9f41d313c8b94646c6904f9.pdf]

**Fig. S2**

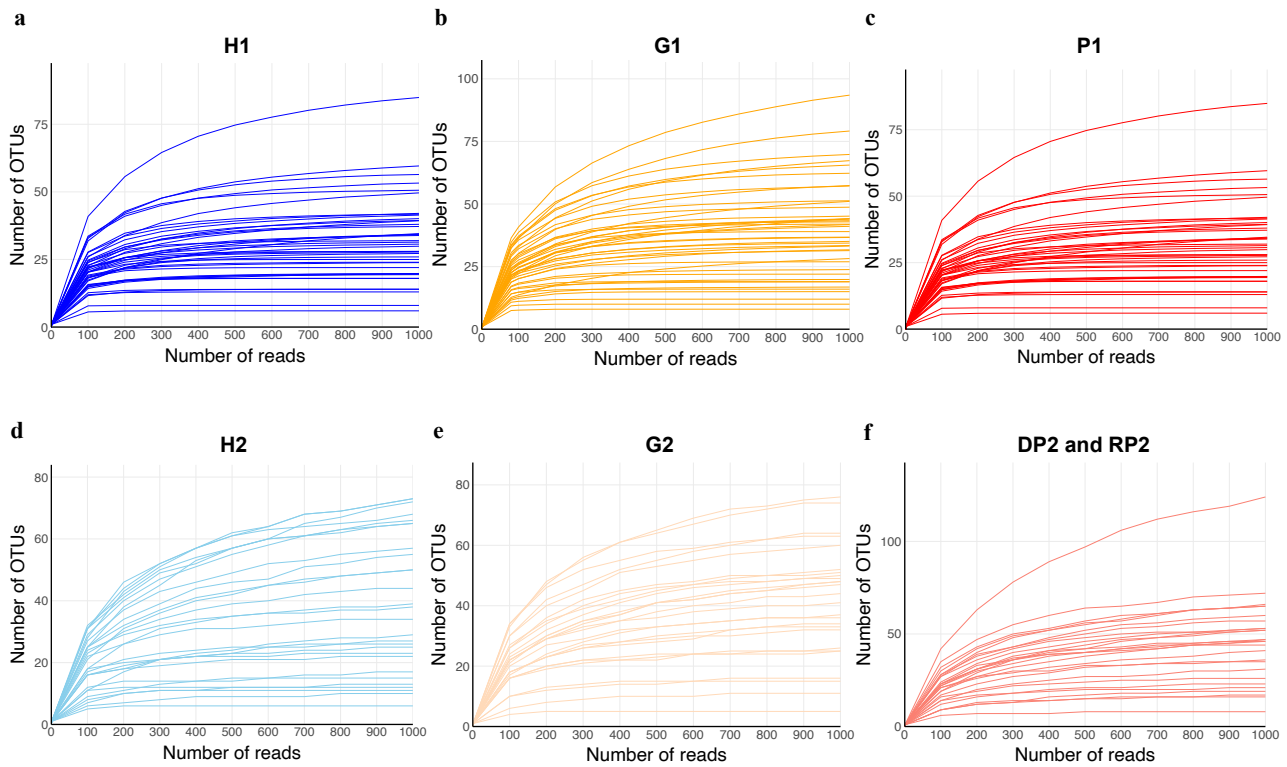

**Supplementary Fig. S2 Rarefaction curves of pre- and post-treatment bacterial samples.** Rarefaction curves show the number of observed OTUs and the sufficiency of their read counts. (a-c) Pre-treatment samples (H1, G1, P1) from 42 subjects with sufficient read counts were used. (d-f) Post-treatment samples (H2, G2, DP2 and RP2) with sufficient read counts were used.
