# Supplementary material for: Metatranscriptomic Insights into Microbial Network Modulation and Pathogen Dynamics Underlying Healing Outcomes in Non-Surgical Periodontal Treatment
Source: Research Square preprint supplement (doi:10.21203/rs.3.rs-5764431/v1), 2025-01-09
Supplement: Supplementary file 4 [file f43338e615774aade9960fb2.pdf]

Fig. S10

**a** Differentially expressed genes in H2 compared to H1

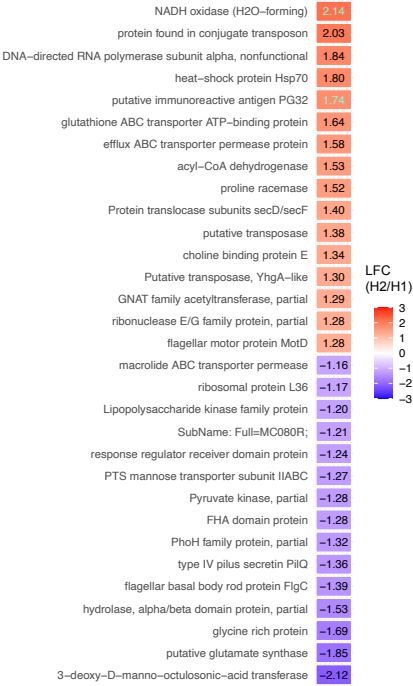

**b** Differentially expressed genes in G2 compared to G1

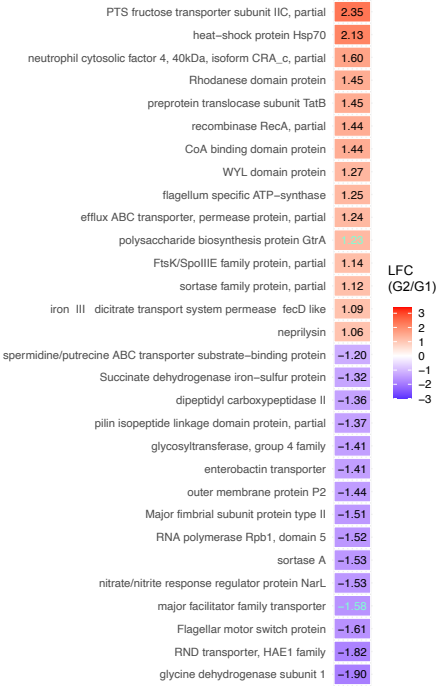

**c** Differentially expressed genes in DP2 compared to DP1

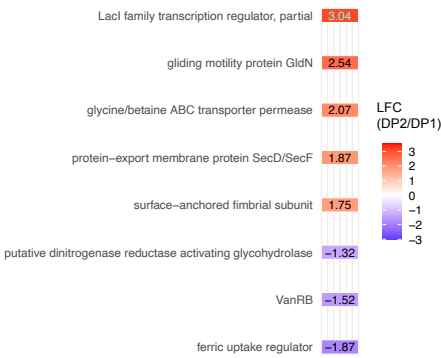

**d** Differentially expressed genes in RP2 compared to RP1

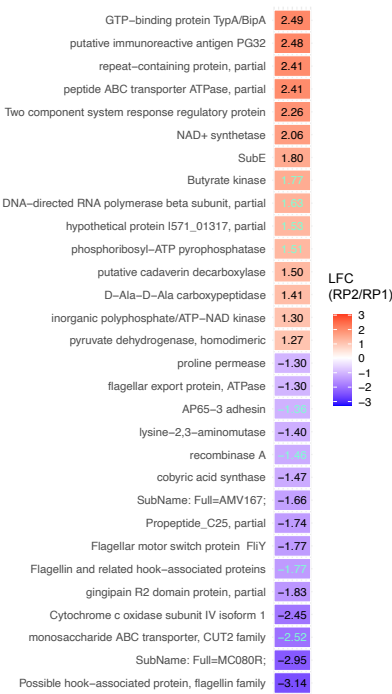

**Fig. S10**  
**e      Differentially expressed genes in DP2 compared to RP2**

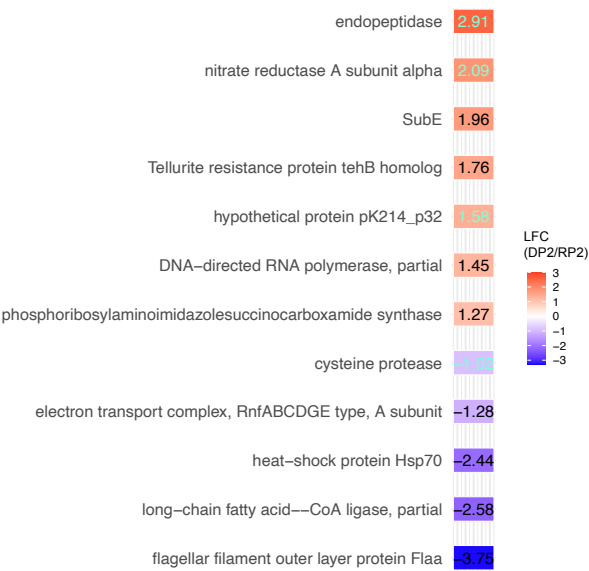

**Supplementary Fig. S10 Heatmaps of DEGs with significant expression changes in each group based on MvirDB.** Group names are as indicated in Fig 1. (a-d) DEGs in the H, G, DP, and RP groups between pre- and post-treatment. (e) DEGs between DP2 and RP2.
